# Supplementary material
Source: publisher site journal article supplement (https://www.dovepress.com/article/601477)
Supplement: Supplementary file 1 [file Supplementary%20Material.pdf]

## Supplementary Material 1: Pain education search strategies

### Basic Search String

(Pediatric\* OR paediatric\* OR child\* OR adolescen\* OR young adult\* OR youth\* OR teen\* OR young people\* or young person)

AND

(chronic pain\* OR widespread chronic pain\* OR chronic primary pain\* OR chronic secondary pain\* OR persistent pain\* OR ongoing pain OR musculoskeletal pain OR long-term pain\*)

AND

(health education OR community education OR community education program\* OR community health OR community health program\* OR self-manag\* OR self-management program\* OR management OR education\* program\* OR education\* resource\* OR patient education)

Limited to past 15 years (2010-2025)

### Medline – 1,771 results (1/5/2025)

- Limited to past 15 years
- Limited to “all children” (0-18) and “young adult” (19 –24 years)

(pediatrics.sh OR exp child OR exp adolescent OR exp young adult OR (pediatric\* OR paediatric\* OR child\* OR adolescen\* OR young adult\* OR youth\* OR young people\* or young person\* OR teen\*).ti,ab,kw.)

AND

(chronic pain.sh OR (chronic pain\* OR widespread chronic pain\* OR chronic primary pain\* OR chronic secondary pain\* OR persistent pain\* OR ongoing pain OR musculoskeletal pain OR long-term pain\*).ti,ab,kw.)

AND

( health education.sh OR self-management.sh OR health promotion.sh OR 'patient education as topic'.sh OR

(health education OR community education OR community education program\* OR community health OR community health program\* OR self-manag\* OR self-management program\* OR management OR education program\* OR education resource\* OR patient education).ti,ab,kw.)

limit 1 to (yr="2010 - 2025" and ("all child (0 to 18 years)" or "young adult (19 to 24 years)"))

From Medline 28/11/25:

1. (pediatrics.sh. or exp child/ or exp adolescent/ or exp young adult/ or (pediatric\* or paediatric\* or child\* or adolescen\* or young adult\* or youth\* or young people\* or young person\* or teen\*).ti,ab,kw.) and (chronic pain.sh. or (chronic pain\* or widespread chronic pain\* or chronic primary pain\* or chronic secondary pain\* or persistent pain\* or ongoing pain or musculoskeletal pain or long-term pain\*).ti,ab,kw.) and ((health education or self-management or health promotion or 'patient education as topic').sh. or (health education or community education or community education program\* or community health or community health program\* or self-manag\* or self-management program\* or management or education program\* or education resource\* or patient education).ti,ab,kw.)

2. limit 1 to (yr="2010 - 2025" and ("all child (0 to 18 years)" or "young adult (19 to 24 years)"))

### **CINAHL – 2,289 results (1/5/2025)**

Filtered for all child, adolescent (13-18) and adult (19-44)

(  
MH "Pediatrics+" OR MH "Child+" OR MH "Adolescence+" OR MH "Young Adult+" OR  
TI (pediatric\* OR paediatric\* OR child\* OR adolescen\* OR "young adult\*" OR youth\* OR teen\*  
OR young people\* or young person\*) OR  
AB (pediatric\* OR paediatric\* OR child\* OR adolescen\* OR "young adult\*" OR youth\* OR  
teen\* OR young people\* or young person\*)  
)  
AND  
(  
MH "Chronic Pain+" OR  
TI (chronic pain\* OR "widespread chronic pain\*" OR "chronic primary pain\*" OR "chronic  
secondary pain\*" OR persistent pain\* OR "long-term pain\*" OR ongoing pain OR  
musculoskeletal pain) OR  
AB (chronic pain\* OR "widespread chronic pain\*" OR "chronic primary pain\*" OR "chronic  
secondary pain\*" OR persistent pain\* OR ongoing pain OR musculoskeletal pain OR "long-term  
pain\*")  
)

AND

(

MH "Health Education+" OR MH "Self Care+" OR MH "Health Promotion+" OR MH "Patient Education as Topic+" OR

TI ("health education" OR "community education" OR "community education program\*" OR "community health" OR "community health program\*" OR self-manag\* OR "self-management program\*" OR management OR "education program\*" OR "education resource\*" OR "patient education") OR

AB ("health education" OR "community education" OR "community education program\*" OR "community health" OR "community health program\*" OR self-manag\* OR "self-management program\*" OR management OR "education program\*" OR "education resource\*" OR "patient education")

)

### **PsychINFO – 328 results (1/5/2025)**

Limited to 2010-2025

(pediatrics.sh OR exp child OR exp adolescent OR exp young adult OR

(pediatric\* OR paediatric\* OR child\* OR adolescen\* OR young adult\* OR youth\* OR teen\* or young people\* or young person\*).ti,ab)

AND

(chronic pain.sh OR

(chronic pain\* OR widespread chronic pain\* OR chronic primary pain\* OR chronic secondary pain\* OR persistent pain\* OR ongoing pain OR musculoskeletal pain OR long-term pain\*).ti,ab)

AND

( health education.sh OR self-management.sh OR health promotion.sh OR 'patient education as topic'.sh OR

(health education OR community education OR community education program\* OR community health OR community health program\* OR self-manag\* OR self-management program\* OR management OR education program\* OR education resource\* OR patient education).ti,ab)

limit 1 to yr="2010 - 2025"

From PsycInfo 28/11/25:

(pediatrics.sh. or exp child/ or exp adolescent/ or exp young adult/ or (pediatric\* or paediatric\* or child\* or adolescen\* or young adult\* or youth\* or teen\* or young people\* or young person\*).ti,ab.) and (chronic pain.sh. or (chronic pain\* or widespread chronic pain\* or chronic primary pain\* or chronic secondary pain\* or persistent pain\* or ongoing pain or musculoskeletal pain or long-term

pain\*).ti,ab.) and ((health education or self-management or health promotion or 'patient education as topic').sh. or (health education or community education or community education program\* or community health or community health program\* or self-manag\* or self-management program\* or management or education program\* or education resource\* or patient education).ti,ab.)

2. limit 1 to yr="2010 - 2025"

### **Pubmed – 61 results (1/5/2025)**

Limited to past 15 years

("Pediatrics"[MeSH] OR "Child"[MeSH] OR "Adolescent"[MeSH] OR "Young Adult"[MeSH] OR pediatric\*[tiab] OR paediatric\*[tiab] OR child\*[tiab] OR adolescen\*[tiab] OR young adult\*[tiab] OR youth\*[tiab] OR teen\*[tiab] OR young people\*[tiab] OR young person\*[tiab])

AND

("Chronic Pain"[MeSH] OR chronic pain\*[tiab] OR widespread chronic pain\*[tiab] OR chronic primary pain\*[tiab] OR chronic secondary pain\*[tiab] OR persistent pain\*[tiab] OR ongoing pain[tiab] OR musculoskeletal pain [tiab] OR long-term pain\*[tiab])

AND

("Health Education"[MeSH] OR "Self-Management"[MeSH] OR "Health Promotion"[MeSH] OR "Patient Education as Topic"[MeSH] OR health education[tiab] OR community education[tiab] OR community education program\*[tiab] OR community health[tiab] OR community health program\*[tiab] OR self-manag\*[tiab] OR self-management program\*[tiab] OR management[tiab] OR education program\*[tiab] OR education resource\*[tiab] OR patient education[tiab])

### **Google Search:**

intitle:(Pediatric OR Paediatric OR children OR childhood OR adolescent OR "young adult" OR "young person" OR "young people") AND ("chronic pain") and (education OR "self manage" OR self-manage OR program OR "patient education") 2010..2025

Supplementary Material 2: Reference List of Included Records

| Title                                                                                                                                                                                                                                 | Authors       | Year | Country                   | Name of program/resource:                     | Study design or location resource was found:    | Condition category             | Full reference                                                                                                                                                                                                                                                                                                                                                                                        |
|---------------------------------------------------------------------------------------------------------------------------------------------------------------------------------------------------------------------------------------|---------------|------|---------------------------|-----------------------------------------------|-------------------------------------------------|--------------------------------|-------------------------------------------------------------------------------------------------------------------------------------------------------------------------------------------------------------------------------------------------------------------------------------------------------------------------------------------------------------------------------------------------------|
| The Dream Machine <sup>21</sup>                                                                                                                                                                                                       | Amarante      | 2023 | Other: Author is Canadian | The Dream Machine                             | Other: Children's book with Educational Content | Osteogenesis Imperfecta        | <a href="#">Amarante, C. (2022). The Dream Machine. Tellwell Talent. <br/>https://www.amazon.com.au/Dream-Machine-Dave-Reed/dp/0228846528</a>                                                                                                                                                                                                                                                         |
| Blended-Learning Pain Neuroscience Education and Exercise in High School Students With Chronic Neck Pain: A Randomized Controlled Trial. <sup>23</sup>                                                                                | Andias et al. | 2022 | Other: Portugal           | No title - resource is described in the paper | Randomised controlled trial                     | Chronic pain (musculoskeletal) | <a href="#">Andias, R., Neto, M., &amp; Silva, A. G. (2018). The effects of pain neuroscience education and exercise on pain, muscle endurance, catastrophizing and anxiety in adolescents with chronic idiopathic neck pain: a school-based pilot, randomized and controlled study. <br/>Physiotherapy Theory &amp; Practice, 34(9), 682-691. <br/>https://doi.org/10.1080/09593985.2018.1423590</a> |
| The effects of pain neuroscience education and exercise on pain, muscle endurance, catastrophizing and anxiety in adolescents with chronic idiopathic neck pain: a school-based pilot, randomized and controlled study. <sup>22</sup> | Andias et al. | 2018 | Other: Portugal           | No title - resource is described in the paper | Randomised controlled trial                     | Chronic pain (musculoskeletal) | <a href="#">Andias, R., Sa-Couto, P., &amp; Silva, A. G. (2022). Blended-Learning Pain Neuroscience Education and Exercise in High School Students With Chronic Neck Pain: A Randomized Controlled Trial. <br/>PTJ: Physical Therapy &amp; Rehabilitation Journal, 102(6), 1-13. <br/>https://doi.org/10.1093/ptj/pzac048</a>                                                                         |

Supplementary Material 2: Reference List of Included Records

|                                                                                                                                                                            |                            |      |                    |                                               |                                                 |                                  |                                                                                                                                                                                                                                                                                                                                                                                                                                                                                                                                            |
|----------------------------------------------------------------------------------------------------------------------------------------------------------------------------|----------------------------|------|--------------------|-----------------------------------------------|-------------------------------------------------|----------------------------------|--------------------------------------------------------------------------------------------------------------------------------------------------------------------------------------------------------------------------------------------------------------------------------------------------------------------------------------------------------------------------------------------------------------------------------------------------------------------------------------------------------------------------------------------|
| Acceptability of a Pain History Assessment and Education Chatbot (Dolores) Across Age Groups in Populations With Chronic Pain: Development and Pilot Testing <sup>24</sup> | Andrews et al.             | 2023 | Australia          | Dolores chatbot                               | Non-randomised experimental study               | Chronic pain (unspecified)       | Andrews, N. E., Ireland, D., Vijayakumar, P., Burvill, L., Hay, E., Westerman, D., Rose, T., Schlumpf, M., Strong, J., & Claus, A. (2023). Acceptability of a Pain History Assessment and Education Chatbot (Dolores) Across Age Groups in Populations With Chronic Pain: Development and Pilot Testing. <i>JMIR Form Res</i> , 7, e47267. <a href="https://doi.org/10.2196/47267">https://doi.org/10.2196/47267</a>                                                                                                                       |
| Headache Relief Guide <sup>25</sup>                                                                                                                                        | Bickel & Connelly          |      | United States      | Headache Relief Guide                         | Website                                         | Chronic pain (Headache/migraine) | Bickel, J., & Connelly, M. (2025). Headache Relief Guide. <a href="https://www.headachereliefguide.com/about.php">https://www.headachereliefguide.com/about.php</a>                                                                                                                                                                                                                                                                                                                                                                        |
| Chronic Pain as You've Never Heard It Before   The Comfort Ability Program, Boston Children's Hospital <sup>26</sup>                                                       | Boston Children's Hospital | 2024 | United States      | The ComfortAbility Program                    | Other: Licenced manual and accompanying website | Chronic pain (unspecified)       | Boston Children's Hospital. (2025). Chronic Pain as You've Never Heard It Before   The Comfort Ability Program, . <a href="https://chronicpainasyouveneverhearditbefore.podbean.com/">https://chronicpainasyouveneverhearditbefore.podbean.com/</a>                                                                                                                                                                                                                                                                                        |
| Can pain neurophysiology education contribute to improving the functional abilities of chronic pain patients from a physiotherapeutic perspective? <sup>27</sup>           | Brem                       | 2009 | Other: Switzerland | No title - resource is described in the paper | Case report                                     | Chronic pain (musculoskeletal)   | Brem, P. (2010). Can pain neurophysiology education contribute to improving the functional abilities of chronic pain patients from a physiotherapeutic perspective? <i>Manuelle Therapie</i> , 14(1), 22-28. <a href="https://search.ebscohost.com/login.aspx?direct=true&amp;AuthType=sso&amp;db=cul&amp;AN=105163920&amp;site=ehost-live&amp;scope=site&amp;custid=s6967740">https://search.ebscohost.com/login.aspx?direct=true&amp;AuthType=sso&amp;db=cul&amp;AN=105163920&amp;site=ehost-live&amp;scope=site&amp;custid=s6967740</a> |

Supplementary Material 2: Reference List of Included Records

|                                                                                                                                                                                                |                                      |      |               |                                                           |                                   |                                |                                                                                                                                                                                                                                                                                                                                                                                                                                                                                                                                |
|------------------------------------------------------------------------------------------------------------------------------------------------------------------------------------------------|--------------------------------------|------|---------------|-----------------------------------------------------------|-----------------------------------|--------------------------------|--------------------------------------------------------------------------------------------------------------------------------------------------------------------------------------------------------------------------------------------------------------------------------------------------------------------------------------------------------------------------------------------------------------------------------------------------------------------------------------------------------------------------------|
| MyCarePath Modules <sup>28</sup>                                                                                                                                                               | British Columbia Children's Hospital | 2025 | Canada        | MyCarePath - Our Modules                                  | Website                           | Chronic pain (unspecified)     | British Columbia Children's Hospital. (2024). MyCarePath Modules. <a href="https://mycarepath.ca/courses">https://mycarepath.ca/courses</a>                                                                                                                                                                                                                                                                                                                                                                                    |
| Cognitive Functional Therapy for the Management of Low Back Pain in an Adolescent Male Rower: A Case Report. <sup>29</sup>                                                                     | Caneiro et al.                       | 2013 | Australia     | No title - resource is described in the paper             | Case report                       | Chronic pain (musculoskeletal) | Cañeiro, J., Ng, L., Burnett, A., Campbell, A., & O'Sullivan, P. (2013). Cognitive Functional Therapy for the Management of Low Back Pain in an Adolescent Male Rower: A Case Report. 43, 542-554. <a href="https://search.ebscohost.com/login.aspx?direct=true&amp;AuthType=sso&amp;db=cul&amp;AN=89686631&amp;site=ehost-live&amp;scope=site&amp;custid=s6967740">https://search.ebscohost.com/login.aspx?direct=true&amp;AuthType=sso&amp;db=cul&amp;AN=89686631&amp;site=ehost-live&amp;scope=site&amp;custid=s6967740</a> |
| The effect of self-management online modules plus nurse-led support on pain and quality of life among young adults with irritable bowel syndrome: A randomized controlled trial. <sup>31</sup> | Chen et al.                          | 2022 | United States | No title - resource is described in the paper             | Randomised controlled trial       | Chronic pain (Abdominal)       | Chen, A. T., Swaminathan, A., Kearns, W. R., Alberts, N. M., Law, E. F., & Palermo, T. M. (2019). Understanding User Experience: Exploring Participants' Messages With a Web-Based Behavioral Health Intervention for Adolescents With Chronic Pain. <i>Journal of Medical Internet Research</i> , 21(4), N.PAG-N.PAG. <a href="https://doi.org/10.2196/11756">https://doi.org/10.2196/11756</a>                                                                                                                               |
| Understanding User Experience: Exploring Participants' Messages With a Web-Based Behavioral Health Intervention for                                                                            | Chen et al.                          | 2019 | United States | Web-based Management for Adolescent Pain (Web-MAP mobile) | Non-randomised experimental study | Chronic pain (unspecified)     | Chen, J., Zhang, Y., Barandouzi, Z. A., Lee, J., Zhao, T., Xu, W., Chen, M.-H., Feng, B., Starkweather, A., & Cong, X. (2022). The effect of self-management online modules plus nurse-led support on pain and quality of life among young adults with irritable bowel                                                                                                                                                                                                                                                         |

Supplementary Material 2: Reference List of Included Records

|                                                                                                                                                                                |                        |      |               |                                       |                                   |  |                                                                                            |                                                                                                                                                                                                                                                                                                                                                                                                                    |
|--------------------------------------------------------------------------------------------------------------------------------------------------------------------------------|------------------------|------|---------------|---------------------------------------|-----------------------------------|--|--------------------------------------------------------------------------------------------|--------------------------------------------------------------------------------------------------------------------------------------------------------------------------------------------------------------------------------------------------------------------------------------------------------------------------------------------------------------------------------------------------------------------|
| Adolescents With Chronic Pain. <sup>30</sup>                                                                                                                                   |                        |      |               |                                       |                                   |  |                                                                                            | syndrome: A randomized controlled trial. International journal of nursing studies, 132, N.PAG-N.PAG.<br><a href="https://doi.org/10.1016/j.ijnurstu.2022.104278">https://doi.org/10.1016/j.ijnurstu.2022.104278</a>                                                                                                                                                                                                |
| Kids In Pain - Chronic Pain Australia <sup>32</sup>                                                                                                                            | Chronic Pain Australia | 2020 | Australia     | Kids In Pain - Chronic Pain Australia | Website                           |  | Chronic pain (unspecified)                                                                 | Chronic Pain Australia. (2024). Kids In Pain - Chronic Pain Australia.<br><a href="https://chronicpinaustralia.org.au/kids-in-pain/">https://chronicpinaustralia.org.au/kids-in-pain/</a>                                                                                                                                                                                                                          |
| Mobilizing the psychology evidence base for the treatment of pediatric chronic pain: The development, implementation, and impact of the Comfort Ability Program. <sup>33</sup> | Coakley et al.         | 2019 | United States | The ComfortAbility Program            | Other: Review paper               |  | Chronic pain (headache/migraine; chronic pain (abdominal); chronic pain (musculoskeletal)) | Coakley, R., & Bujoreanu, S. (2020). Mobilizing the psychology evidence base for the treatment of pediatric chronic pain: The development, implementation, and impact of the Comfort Ability Program. Paediatric & Neonatal Pain, 2(4), 148-159.<br><a href="https://doi.org/10.1002/pne2.12019">https://doi.org/10.1002/pne2.12019</a>                                                                            |
| The Comfort Ability Pain Management Workshop: A Preliminary, Nonrandomized Investigation of a Brief, Cognitive, Biobehavioral, and Parent Training Intervention for            | Coakley et al.         | 2018 | United States | The ComfortAbility Program            | Non-randomised experimental study |  | Chronic pain (unspecified)                                                                 | Coakley, R., Wihak, T., Kossowsky, J., Iversen, C., & Donado, C. (2018). The Comfort Ability Pain Management Workshop: A Preliminary, Nonrandomized Investigation of a Brief, Cognitive, Biobehavioral, and Parent Training Intervention for Pediatric Chronic Pain. Journal of Pediatric Psychology, 43(3), 253-265.<br><a href="https://doi.org/10.1093/jpepsy/jsx112">https://doi.org/10.1093/jpepsy/jsx112</a> |

Supplementary Material 2: Reference List of Included Records

|                                                                                                          |                                    |      |               |                                                 |                       |                                                     |  |                                                                                                                                                                                                                                                                                                                                                                                                                                                   |
|----------------------------------------------------------------------------------------------------------|------------------------------------|------|---------------|-------------------------------------------------|-----------------------|-----------------------------------------------------|--|---------------------------------------------------------------------------------------------------------------------------------------------------------------------------------------------------------------------------------------------------------------------------------------------------------------------------------------------------------------------------------------------------------------------------------------------------|
| Pediatric Chronic Pain. <sup>34</sup>                                                                    |                                    |      |               |                                                 |                       |                                                     |  | Cooke, M., Richards, J., Tjondronegoro, D., Raj Chakraborty, P., Jauncey-Cooke, J., Andresen, E., Theodoros, J., Paterson, R., Schults, J., Raithatha, B., Wilson, S., & Alcock, M. (2021). myPainPal: Co-creation of a mHealth app for the management of chronic pain in young people. <i>Inform Health Soc Care</i> , 46(3), 291-305. <a href="https://doi.org/10.1080/17538157.2021.1892697">https://doi.org/10.1080/17538157.2021.1892697</a> |
| myPainPal: Co-creation of a mHealth app for the management of chronic pain in young people <sup>35</sup> | Cooke et al.                       | 2021 | Australia     | myPainPal                                       | Qualitative research  | Chronic pain (unspecified)                          |  |                                                                                                                                                                                                                                                                                                                                                                                                                                                   |
| Flippin' Pain <sup>36</sup>                                                                              | Cora Health Group                  | 2025 | UK            | Flippin' Pain                                   | Website               | Chronic pain (unspecified)                          |  | Cora Health Group. (2025). <i>Flippin' Pain</i> . <a href="https://www.flippinpain.co.uk/#">https://www.flippinpain.co.uk/#</a>                                                                                                                                                                                                                                                                                                                   |
| Creative healing for youth and pain <sup>37</sup>                                                        | Creative Healing for Youth in Pain | 2025 | United States | Creative Healing for Youth in Pain              | Website               | Chronic pain (unspecified)                          |  | Creative Healing for Youth in Pain. (2025). <i>Creative healing for youth in pain</i> . <a href="https://mychyp.org">https://mychyp.org</a>                                                                                                                                                                                                                                                                                                       |
| HELP Lab: Healing Emotional Illness Pain <sup>38</sup>                                                   | Cunningham                         | 2024 | United States | HELP Lab: Healing Emotional Illness Pain videos | Other: Youtube videos | Lupus                                               |  | Cunningham, N. (2023). <i>HELP Lab: Healing Emotional Illness Pain Michigan State University HELP Lab</i> . <a href="https://www.youtube.com/@MSUhelplab">https://www.youtube.com/@MSUhelplab</a>                                                                                                                                                                                                                                                 |
| How does your brain respond to pain? (TED-Ed) <sup>39</sup>                                              | Davis                              | 2014 | Canada        | How does your brain respond to pain? (TED-Ed)   | Other: Youtube video  | Chronic pain (unspecified)                          |  | Davis, K. D. (2014). <i>How does your brain respond to pain? (TED-Ed)</i> . <a href="https://www.youtube.com/watch?v=l7wfDenj6CQ">https://www.youtube.com/watch?v=l7wfDenj6CQ</a>                                                                                                                                                                                                                                                                 |
| Kids B.E.A.R. Pain: A Pediatric Psychosocial Chronic Pain Protocol <sup>40</sup>                         | Dawson et al.                      | 2023 | United States | Kids B.E.A.R. Pain                              | Other: Protocol       | Sickle cell disease; Lupus; Arthritis; Chronic pain |  | Dawson, S., Scott, E., Elder, L., Omodior, E., & Harrison, A. H. (2023). <i>Kids B.E.A.R. Pain: A Pediatric Psychosocial Chronic Pain Protocol</i> .                                                                                                                                                                                                                                                                                              |

Supplementary Material 2: Reference List of Included Records

|                                                                                                                                                                                                                |                   |      |               |                                                           |                                   |                                                    |                                                                                                                                                                                                                                                                                                                                                                                                   |
|----------------------------------------------------------------------------------------------------------------------------------------------------------------------------------------------------------------|-------------------|------|---------------|-----------------------------------------------------------|-----------------------------------|----------------------------------------------------|---------------------------------------------------------------------------------------------------------------------------------------------------------------------------------------------------------------------------------------------------------------------------------------------------------------------------------------------------------------------------------------------------|
|                                                                                                                                                                                                                |                   |      |               |                                                           |                                   | (headache/migraine, Chronic pain (abdominal), CRPS | <a href="https://doi.org/10.18666/TRJ-2023-V57-I2-11885">Therapeutic Recreation Journal, 57(2).<br/>https://doi.org/10.18666/TRJ-2023-V57-I2-11885</a>                                                                                                                                                                                                                                            |
| Assessing Digital Health Implementation for a Pediatric Chronic Pain Intervention: Comparing the RE-AIM and BIT Frameworks Against Real-World Trial Data and Recommendations for Future Studies. <sup>41</sup> | de la Vega et al. | 2020 | United States | Web-based Management for Adolescent Pain (Web-MAP mobile) | Randomised controlled trial       | Chronic pain (unspecified)                         | <a href="https://doi.org/10.2196/19898">de la Vega, R., Ritterband, L., &amp; Palermo, T. M. (2020). Assessing Digital Health Implementation for a Pediatric Chronic Pain Intervention: Comparing the RE-AIM and BIT Frameworks Against Real-World Trial Data and Recommendations for Future Studies. Journal of Medical Internet Research, 22(9), N.PAG-N.PAG. https://doi.org/10.2196/19898</a> |
| Fibroline: A mobile app for improving the quality of life of young people with fibromyalgia <sup>42</sup>                                                                                                      | de la Vega et al. | 2018 | Other: Spain  | Fibroline                                                 | Non-randomised experimental study | Fibromyalgia                                       | <a href="https://doi.org/10.1177/1359105316650509">de la Vega, R., Roset, R., Galán, S., &amp; Miró, J. (2016). Fibroline: A mobile app for improving the quality of life of young people with fibromyalgia. J Health Psychol, 23(1), 67-78. https://doi.org/10.1177/1359105316650509</a>                                                                                                         |
| Internet-Delivered Psychological Pain-Management for Young Adults With Chronic Pain: An Investigation of Clinical Trial Data. <sup>43</sup>                                                                    | Dudeney et al.    | 2024 | Australia     | The Pain Course                                           | Randomised controlled trial       | Chronic pain (unspecified)                         | <a href="https://doi.org/10.1016/j.jpain.2024.104447">Dudeney, J., Scott, A. J., Hathway, T., Bisby, M. A., Harte, N., Titov, N., &amp; Dear, B. F. (2024). Internet-Delivered Psychological Pain-Management for Young Adults With Chronic Pain: An Investigation of Clinical Trial Data. The Journal of Pain, 25(6), 104447.</a>                                                                 |

Supplementary Material 2: Reference List of Included Records

|                                                                                                                                                                               |                     |      |               |                                                           |                             |                                |                                                                                                                                                                                                                                                                                                                                                                                                        |
|-------------------------------------------------------------------------------------------------------------------------------------------------------------------------------|---------------------|------|---------------|-----------------------------------------------------------|-----------------------------|--------------------------------|--------------------------------------------------------------------------------------------------------------------------------------------------------------------------------------------------------------------------------------------------------------------------------------------------------------------------------------------------------------------------------------------------------|
|                                                                                                                                                                               |                     |      |               |                                                           |                             |                                | <a href="https://doi.org/https://dx.doi.org/10.1016/j.jpain.2023.12.004">https://doi.org/https://dx.doi.org/10.1016/j.jpain.2023.12.004</a>                                                                                                                                                                                                                                                            |
| The Learning About My Pain study protocol: Reducing disparities with literacy-adapted psychosocial treatments for chronic pain, a comparative behavioral trial. <sup>44</sup> | Eyer et al.         | 2016 | United States | Learning About My Pain                                    | Other: Protocol             | Chronic pain (unspecified)     | <a href="https://doi.org/https://dx.doi.org/10.1177/1359105315570985">Eyer, J. C., &amp; Thorn, B. E. (2016). The Learning About My Pain study protocol: Reducing disparities with literacy-adapted psychosocial treatments for chronic pain, a comparative behavioral trial. J Health Psychol, 21(9), 2063-2074. https://doi.org/https://dx.doi.org/10.1177/1359105315570985</a>                      |
| Sleep outcomes in youth with chronic pain participating in a randomized controlled trial of online cognitive-behavioral therapy for pain management. <sup>45</sup>            | Fales et al.        | 2015 | United States | Web-based Management for Adolescent Pain (Web-MAP mobile) | Randomised controlled trial | Chronic pain (unspecified)     | <a href="https://doi.org/https://dx.doi.org/10.1080/15402002.2013.845779">Fales, J., Palermo, T. M., Law, E. F., &amp; Wilson, A. C. (2015). Sleep outcomes in youth with chronic pain participating in a randomized controlled trial of online cognitive-behavioral therapy for pain management. Behav Sleep Med, 13(2), 107-123. https://doi.org/https://dx.doi.org/10.1080/15402002.2013.845779</a> |
| Effects of a person-centred approach in a school setting for adolescents with chronic pain-The HOPE randomized controlled trial. <sup>46</sup>                                | Fors et al.         | 2019 | Other: Sweden | Help Overcoming Pain Early (HOPE)                         | Randomised controlled trial | Chronic pain (unspecified)     | <a href="https://doi.org/10.1002/ejp.1614">Fors, A., Wallbing, U., Alfvén, G., Kemani, M. K., Lundberg, M., Wigert, H., &amp; Nilsson, S. (2020). Effects of a person-centred approach in a school setting for adolescents with chronic pain-The HOPE randomized controlled trial. European Journal of Pain, 24(8), 1598-1608. https://doi.org/10.1002/ejp.1614</a>                                    |
| Pain neuroscience education and                                                                                                                                               | Galan-Martin et al. | 2019 | Other: Spain  | No title - resource is described in the paper             | Randomised controlled trial | Chronic pain (musculoskeletal) | <a href="https://doi.org/https://dx.doi.org/10.1016/j.jpain.2023.12.004">Galán-Martín, M. A., Montero-Cuadrado, F., Lluch-Girbes, E., Coca-</a>                                                                                                                                                                                                                                                        |

Supplementary Material 2: Reference List of Included Records

|                                                                                                                                               |                               |      |                |                                                   |                                   |  |                                  |                                                                                                                                                                                                                                                                                                                                                                                                                                                 |
|-----------------------------------------------------------------------------------------------------------------------------------------------|-------------------------------|------|----------------|---------------------------------------------------|-----------------------------------|--|----------------------------------|-------------------------------------------------------------------------------------------------------------------------------------------------------------------------------------------------------------------------------------------------------------------------------------------------------------------------------------------------------------------------------------------------------------------------------------------------|
| physical exercise for patients with chronic spinal pain in primary healthcare: a randomised trial protocol. <sup>47</sup>                     |                               |      |                |                                                   |                                   |  |                                  | López, M. C., Mayo-Iscar, A., & Cuesta-Vargas, A. (2019). Pain neuroscience education and physical exercise for patients with chronic spinal pain in primary healthcare: a randomised trial protocol. <i>BMC Musculoskeletal Disorders</i> , 20(1), N.PAG-N.PAG. <a href="https://doi.org/10.1186/s12891-019-2889-1">https://doi.org/10.1186/s12891-019-2889-1</a>                                                                              |
| myHeadeggs <sup>49</sup>                                                                                                                      | German Paediatric Pain Centre | 2025 | Other: Germany | Headeggs                                          | Website                           |  | Chronic pain (headache/migraine) | German Paediatric Pain, C. (2022). Our aim: You've got control of your pain! <a href="https://www.deutsches-kinderschmerzzentrum.de/en/">https://www.deutsches-kinderschmerzzentrum.de/en/</a>                                                                                                                                                                                                                                                  |
| Our aim: You've got control of your pain! <sup>48</sup>                                                                                       | German Paediatric Pain Centre | 2022 | Other: Germany | German Paediatric Pain Centre website             | Website                           |  | Chronic pain (unspecified)       | German Pediatric Pain, C. (2025). myHeadeggs. <a href="http://headeggs.org/">http://headeggs.org/</a>                                                                                                                                                                                                                                                                                                                                           |
| The Feasibility and Acceptability of Resilience Coaching for Adolescent Chronic Musculoskeletal Pain: A Single-Arm Pilot Trial. <sup>50</sup> | Gmuca et al.                  | 2022 | United States  | Promoting Resilience in Stress Management (PRISM) | Non-randomised experimental study |  | Chronic pain (musculoskeletal)   | Gmuca, S., Weiss, P. F., McGill, M., Xiao, R., Ward, M., Nelson, M., Sherry, D. D., Cronholm, P. F., Gerber, J. S., Palermo, T. M., Young, J. F., & Rosenberg, A. R. (2022). The Feasibility and Acceptability of Resilience Coaching for Adolescent Chronic Musculoskeletal Pain: A Single-Arm Pilot Trial. <i>Children</i> , 9(10), 1432-N.PAG. <a href="https://doi.org/10.3390/children9101432">https://doi.org/10.3390/children9101432</a> |
| Peer mentorship teaches social tools for pain self-management: A case study. <sup>51</sup>                                                    | Goldenberg et al.             | 2013 | United States  | No title - resource is described in the paper     | Case report                       |  | Chronic pain (unspecified)       | Goldenberg, D., Payne, L. A., Hayes, L. P., Zeltzer, L. K., & Tsao, J. C. I. (2013). Peer mentorship teaches social tools for pain self-management: A case study. <i>J Pain Manag</i> , 6(1), 61-68.                                                                                                                                                                                                                                            |

Supplementary Material 2: Reference List of Included Records

|                                                                                                                                                                           |              |      |                   |                                                                                         |                             |                                  |                                                                                                                                                                                                                                                                                                                                                                                                                                                                                                                            |
|---------------------------------------------------------------------------------------------------------------------------------------------------------------------------|--------------|------|-------------------|-----------------------------------------------------------------------------------------|-----------------------------|----------------------------------|----------------------------------------------------------------------------------------------------------------------------------------------------------------------------------------------------------------------------------------------------------------------------------------------------------------------------------------------------------------------------------------------------------------------------------------------------------------------------------------------------------------------------|
| Evaluation of a Cognitive-Behavioral Pain Management Program for Children with Chronic Abdominal Pain: A Randomized Controlled Study. <sup>52</sup>                       | Gross et al. | 2013 | Other:<br>Germany | Stop the pain with Happy-Pingu                                                          | Randomised controlled trial | Chronic pain (Abdominal)         | Groß, M., & Warschburger, P. (2013). Evaluation of a Cognitive-Behavioral Pain Management Program for Children with Chronic Abdominal Pain: A Randomized Controlled Study. <i>Int J Behav Med</i> , 20(3), 434-443. <a href="https://doi.org/10.1007/s12529-012-9228-3">https://doi.org/10.1007/s12529-012-9228-3</a>                                                                                                                                                                                                      |
| Improving the Patient Experience With Migraine Camp, a One Day Group Intervention for Adolescents With Chronic Headache and Their Parents. <sup>53</sup>                  | Hall et al.  | 2019 | United States     | Migraine Camp                                                                           | Case report                 | Chronic pain (Headache/migraine) | Hall, A. L., Karvounides, D., Gelfand, A. A., Mankin, H., Kessel, S., Corroo, J., Malavolta, C. P., Pezzuto, T., Chadehumbe, M., & Szperka, C. L. (2019). Improving the Patient Experience With Migraine Camp, a One-Day Group Intervention for Adolescents With Chronic Headache and Their Parents. <i>Headache: The Journal of Head &amp; Face Pain</i> , 59(8), 1392-1400. <a href="https://doi.org/10.1111/head.13570">https://doi.org/10.1111/head.13570</a>                                                          |
| The Acceptability, Feasibility, and Preliminary Effects of a Cognitive Behavioral Skills Building Intervention in Adolescents With Chronic Daily Headaches. <sup>54</sup> | Hickman      | 2014 | United States     | Creating Opportunities for Personal Empowerment - Headache Education Program (COPE-HEP) | Randomised controlled trial | Chronic pain (headache/migraine) | Hickman, C. (2012). The Acceptability, Feasibility, and Preliminary Effects of a Cognitive Behavioral Skills Building Intervention in Adolescents With Chronic Daily Headaches. 379 p-379 p. <a href="https://search.ebscohost.com/login.aspx?direct=true&amp;AuthType=sso&amp;db=cui&amp;AN=109859805&amp;site=ehost-live&amp;scope=site&amp;custid=s6967740">https://search.ebscohost.com/login.aspx?direct=true&amp;AuthType=sso&amp;db=cui&amp;AN=109859805&amp;site=ehost-live&amp;scope=site&amp;custid=s6967740</a> |
| Helping adolescents with chronic pain <sup>55</sup>                                                                                                                       | Hoiyan       | 2016 | Australia         | Helping Outside of school hours Pain Program                                            | Website                     | Chronic pain (unspecified)       | Hoiyan, K. L. (2016). Helping adolescents with chronic pain. <i>Australian Psychological Society</i> .                                                                                                                                                                                                                                                                                                                                                                                                                     |

Supplementary Material 2: Reference List of Included Records

|                                                                                                                                                                                                            |                 |      |                |                                                                   |                                   |                            |                                                                                                                                                                                                                                                                                                                                                                                                                                                                |
|------------------------------------------------------------------------------------------------------------------------------------------------------------------------------------------------------------|-----------------|------|----------------|-------------------------------------------------------------------|-----------------------------------|----------------------------|----------------------------------------------------------------------------------------------------------------------------------------------------------------------------------------------------------------------------------------------------------------------------------------------------------------------------------------------------------------------------------------------------------------------------------------------------------------|
|                                                                                                                                                                                                            |                 |      |                |                                                                   |                                   |                            | <a href="https://psychology.org.au/inpsych/2016/august/hoi-li">https://psychology.org.au/inpsych/2016/august/hoi-li</a>                                                                                                                                                                                                                                                                                                                                        |
| The efficacy of an educational movie to improve pain and dysfunctional behavior in school children: A randomized controlled trial. <sup>56</sup>                                                           | Kisling et al.  | 2020 | Other: Germany | Understanding pain - and what's to be done about it in 10 minutes | Randomised controlled trial       | Chronic pain (unspecified) | <a href="https://doi.org/https://dx.doi.org/10.1002/ejp.1777">Kisling, S., Claus, B. B., Stahlschmidt, L., &amp; Wager, J. (2021). The efficacy of an educational movie to improve pain and dysfunctional behavior in school children: A randomized controlled trial. Eur J Pain, 25(7), 1612-1621. https://doi.org/https://dx.doi.org/10.1002/ejp.1777</a>                                                                                                    |
| iPeer2Peer program: a pilot feasibility study in adolescents with chronic pain. <sup>57</sup>                                                                                                              | Kohut et al.    | 2016 | Canada         | iPeer2Peer                                                        | Non-randomised experimental study | Chronic pain (unspecified) | <a href="https://doi.org/10.1097/j.pain.0000000000000496">Kohut, S. A., Stinson, J. N., Ruskin, D., Forgeron, P., Harris, L., van Wyk, M., Luca, S., Campbell, F., &amp; Ahola Kohut, S. (2016). iPeer2Peer program: a pilot feasibility study in adolescents with chronic pain. PAIN, 157(5), 1146-1155. https://doi.org/10.1097/j.pain.0000000000000496</a>                                                                                                  |
| Characterizing User Engagement With a Digital Intervention for Pain Self-management Among Youth With Sickle Cell Disease and Their Caregivers: Subanalysis of a Randomized Controlled Trial. <sup>58</sup> | Laloo et al.    | 2022 | Canada         | iCanCope with Pain™                                               | Randomised controlled trial       | Sickle cell disease        | <a href="https://doi.org/10.2196/40096">Laloo, C., Nishat, F., Zempsky, W., Bakshi, N., Badawy, S., Ko, Y. J., Dampier, C., Stinson, J., &amp; Palermo, T. M. (2022). Characterizing User Engagement With a Digital Intervention for Pain Self-management Among Youth With Sickle Cell Disease and Their Caregivers: Subanalysis of a Randomized Controlled Trial. Journal of Medical Internet Research, 24(8), N.PAG-N.PAG. https://doi.org/10.2196/40096</a> |
| Complex regional pain syndrome                                                                                                                                                                             | Lauder & Massey | 2010 | Canada         | Complex regional pain syndrome (CRPS)                             | Other: Book                       | CRPS                       | <a href="#">Lauder, G. R. (2010). Complex regional pain syndrome</a>                                                                                                                                                                                                                                                                                                                                                                                           |

Supplementary Material 2: Reference List of Included Records

|                                                                                                                                          |              |      |               |                                                            |                                                                                                                                            |                                  |                                                                                                                                                                                                                                                                                                                                                                                                |
|------------------------------------------------------------------------------------------------------------------------------------------|--------------|------|---------------|------------------------------------------------------------|--------------------------------------------------------------------------------------------------------------------------------------------|----------------------------------|------------------------------------------------------------------------------------------------------------------------------------------------------------------------------------------------------------------------------------------------------------------------------------------------------------------------------------------------------------------------------------------------|
| (CRPS) explained: for teenagers, by teenagers "Info that clicks" <sup>59</sup>                                                           |              |      |               | explained: for teenagers, by teenagers "Infor that clicks" |                                                                                                                                            |                                  | (CRPS) explained: for teenagers, by teenagers "Info that clicks". Xlibris Corp.                                                                                                                                                                                                                                                                                                                |
| Evaluating treatment participation in an internet-based behavioral intervention for pediatric chronic pain. <sup>61</sup>                | Law et al.   | 2012 | United States | Web-based Management for Adolescent Pain (Web-MAP mobile)  | Other: RCT but data looks only at treatment participation of intervention group + treatment outcome, so non-randomised experimental study. | Chronic pain (unspecified)       | Law, E. F., Beals-Erickson, S. E., Noel, M., Claar, R., & Palermo, T. M. (2015). Pilot Randomized Controlled Trial of Internet-Delivered Cognitive-Behavioral Treatment for Pediatric Headache. <i>Headache: The Journal of Head &amp; Face Pain</i> , 55(10), 1410-1425. <a href="https://doi.org/10.1111/head.12635">https://doi.org/10.1111/head.12635</a>                                  |
| Executive Functioning and Self-Management Processes Mediate the Relationship Between Insomnia and Pain-Related Disability. <sup>62</sup> | Law et al.   | 2023 | United States | Web-based Management for Adolescent Pain (Web-MAP mobile)  | Non-randomised experimental study                                                                                                          | Chronic pain (unspecified)       | Law, E. F., Murphy, L. K., Palermo, T. M., Law, E. F., Murphy, L. K., & Palermo, T. M. (2012). Evaluating treatment participation in an internet-based behavioral intervention for pediatric chronic pain. <i>Journal of Pediatric Psychology</i> , 37(8), 893-903. <a href="https://doi.org/10.1093/jpepsy/jss057">https://doi.org/10.1093/jpepsy/jss057</a>                                  |
| Pilot Randomized Controlled Trial of Internet-Delivered Cognitive-Behavioral Treatment for Pediatric Headache. <sup>60</sup>             | Law et al.   | 2015 | United States | Web-based Management for Adolescent Pain (Web-MAP mobile)  | Randomised controlled trial                                                                                                                | Chronic pain (headache/migraine) | Law, E. F., Tham, S. W., Howard, W., Ward, T. M., & Palermo, T. M. (2024). Executive Functioning and Self-Management Processes Mediate the Relationship Between Insomnia and Pain-Related Disability. <i>The Journal of Pain</i> , 25(1), 273-283. <a href="https://doi.org/https://dx.doi.org/10.1016/j.jpain.2023.08.010">https://doi.org/https://dx.doi.org/10.1016/j.jpain.2023.08.010</a> |
| Codesign and Evaluation of Pain                                                                                                          | Leake et al. | 2024 | Australia     | chronic_pain_project                                       | Qualitative research                                                                                                                       | Chronic pain (unspecified)       | Leake, H. B., Heathcote, L. C., Ferencz, N., Birnie, K. A., Davis, A., Karran,                                                                                                                                                                                                                                                                                                                 |

Supplementary Material 2: Reference List of Included Records

|                                                                                                                                                           |                      |      |                |                                               |                                   |                                                                                           |                                                                                                                                                                                                                                                                                                                                                                                      |
|-----------------------------------------------------------------------------------------------------------------------------------------------------------|----------------------|------|----------------|-----------------------------------------------|-----------------------------------|-------------------------------------------------------------------------------------------|--------------------------------------------------------------------------------------------------------------------------------------------------------------------------------------------------------------------------------------------------------------------------------------------------------------------------------------------------------------------------------------|
| Science Messages on Social Media With Adolescents With a History of Chronic Pain <sup>63</sup>                                                            |                      |      |                |                                               |                                   |                                                                                           | E. L., Starr, T. S., Thorpe, M., & Moseley, G. L. (2024). Codesign and Evaluation of Pain Science Messages on Social Media With Adolescents With a History of Chronic Pain. <i>The Journal of Pain</i> , 25(9). <a href="https://doi.org/10.1016/j.jpain.2024.104580">https://doi.org/10.1016/j.jpain.2024.104580</a>                                                                |
| Differential changes in functional disability and pain intensity over the course of psychological treatment for children with chronic pain. <sup>64</sup> | Lynch-Jordan et al.  | 2014 | United States  | No title - resource is described in the paper | Non-randomised experimental study | Chronic pain (headache/migraine; Chronic pain (musculoskeletal); Chronic pain (abdominal) | Lynch-Jordan, A. M., Sil, S., Peugh, J., Cunningham, N., Kashikar-Zuck, S., & Goldschneider, K. R. (2014). <a href="https://doi.org/10.1016/j.pain.2014.06.008">Differential changes in functional disability and pain intensity over the course of psychological treatment for children with chronic pain. PAIN, 155(10), 1955-1961. https://doi.org/10.1016/j.pain.2014.06.008</a> |
| A two-week inpatient programme with a booster improved long-term management of severe chronic paediatric pain. <sup>65</sup>                              | Major et al.         | 2017 | Other: Hungary | No title - resource is described in the paper | Cohort study                      | Chronic pain (unspecified)                                                                | Major, J., Varga, Z. K., Gyimesi-Szikszai, A., & Ádám, S. (2017). <a href="https://doi.org/10.1177/1367493517697479">A two-week inpatient programme with a booster improved long-term management of severe chronic paediatric pain. Journal of child health care, 21(2), 171-180. https://doi.org/10.1177/1367493517697479</a>                                                       |
| Multimodal physiotherapy treatment based on a biobehavioral approach for patients with chronic cervico-craniofacial pain: a                               | Marcos-Martin et al. | 2018 | Other: Spain   | No title - resource is described in the paper | Case series                       | Temporomandibular disorder                                                                | Marcos-Martín, F., González-Ferrero, L., Martín-Alcocer, N., Paris-Alemany, A., & La Touche, R. (2018). <a href="#">Multimodal physiotherapy treatment based on a biobehavioral approach for patients with chronic cervico-craniofacial pain: a prospective case series.</a>                                                                                                         |

Supplementary Material 2: Reference List of Included Records

|                                                                                                            |                |              |               |                                                                 |                                   |                                                                                            |  |                                                                                                                                                                                                                                                                                                                         |
|------------------------------------------------------------------------------------------------------------|----------------|--------------|---------------|-----------------------------------------------------------------|-----------------------------------|--------------------------------------------------------------------------------------------|--|-------------------------------------------------------------------------------------------------------------------------------------------------------------------------------------------------------------------------------------------------------------------------------------------------------------------------|
| prospective case series. <sup>66</sup>                                                                     |                |              |               |                                                                 |                                   |                                                                                            |  | Physiotherapy Theory & Practice, 34(9), 671-681.<br><a href="https://doi.org/10.1080/09593985.2017.1423522">https://doi.org/10.1080/09593985.2017.1423522</a>                                                                                                                                                           |
| Video-based pain education in schools: A study with adolescents. <sup>67</sup>                             | Marti et al.   | 2021         | Other: Spain  | No title - resource is described in the paper                   | Non-randomised experimental study | Chronic pain (musculoskeletal); chronic pain (headache/migraine); chronic pain (abdominal) |  | Marti, L., Castarlenas, E., Sole, E., de la Vega, R., & Miro, J. (2021). Video-based pain education in schools: A study with adolescents. Clin J Pain, 37(3), 199-205.<br><a href="https://doi.org/https://dx.doi.org/10.1097/AJP.0000000000000906">https://doi.org/https://dx.doi.org/10.1097/AJP.0000000000000906</a> |
| Knowledge and Experience of In-Home Virtual Reality for Chronic Pain in Sickle Cell Disease. <sup>68</sup> | Matthie et al. | 2024         | United States | EaseVRx                                                         | Qualitative research              | Sickle cell disease                                                                        |  | Matthie, N., & Jenerette, C. (2024). Knowledge and Experience of In-Home Virtual Reality for Chronic Pain in Sickle Cell Disease. The Journal of Pain, 25(12), 104668.<br><a href="https://doi.org/https://dx.doi.org/10.1016/j.jpain.2024.104668">https://doi.org/https://dx.doi.org/10.1016/j.jpain.2024.104668</a>   |
| Translating Emma <sup>69</sup>                                                                             | Mead           | 2025         | Australia     | Translating Emma                                                | Other: Young adult fiction book   | CRPS                                                                                       |  | Mead, J. (2025). <i>Translating Emma</i> . Dettori Publishing.                                                                                                                                                                                                                                                          |
| Chronic Pain Resources <sup>70</sup>                                                                       | Meg Foundation | 2025         | United States | Meg Foundation website                                          | Website                           | Chronic pain (unspecified)                                                                 |  | Meg Foundation. (2025). Chronic Pain Resources. Retrieved 29/9/25 from <a href="https://www.megfoundationforpain.org/chronic-pain-resources/">https://www.megfoundationforpain.org/chronic-pain-resources/</a>                                                                                                          |
| My PainToolkit: For young people and teenagers living with pain <sup>71</sup>                              | Moore & Bird   | Not reported | UK            | My PainToolkit: For young people and teenagers living with pain | Other: PDF                        | Chronic pain (unspecified)                                                                 |  | Moore, P., & Bird, J. My PainToolkit: For young people and teenagers living with pain. In.                                                                                                                                                                                                                              |
| Cognitive Behavioral Therapy for Pediatric                                                                 | Noel et al.    | 2012         | Canada        | No title - resource is described in the paper                   | Non-randomised experimental study | Chronic pain (Abdominal)                                                                   |  | Noel, M., Petter, M., Parker, J. A., & Chambers, C. T. (2012). Cognitive                                                                                                                                                                                                                                                |

Supplementary Material 2: Reference List of Included Records

|                                                                                                                                                         |                                    |           |               |                                                           |                             |                            |                                                                                                                                                                                                                                                                                                                                                                                                                                 |
|---------------------------------------------------------------------------------------------------------------------------------------------------------|------------------------------------|-----------|---------------|-----------------------------------------------------------|-----------------------------|----------------------------|---------------------------------------------------------------------------------------------------------------------------------------------------------------------------------------------------------------------------------------------------------------------------------------------------------------------------------------------------------------------------------------------------------------------------------|
| Chronic Pain: The Problem, Research, and Practice. <sup>72</sup>                                                                                        |                                    |           |               |                                                           |                             |                            | <a href="https://doi.org/10.1891/0889-8391.26.2.143">Behavioral Therapy for Pediatric Chronic Pain: The Problem, Research, and Practice. Journal of Cognitive Psychotherapy, 26(2), 143-156. https://doi.org/10.1891/0889-8391.26.2.143</a>                                                                                                                                                                                     |
| PainBytes <sup>73</sup>                                                                                                                                 | NSW Agency for Clinical Innovation | Australia | PainBytes     | Other: website and videos                                 |                             | Chronic pain (unspecified) | <a href="https://aci.health.nsw.gov.au/chronic-pain/painbytes">NSW Agency for Clinical Innovation. (2024). PainBytes. https://aci.health.nsw.gov.au/chronic-pain/painbytes</a>                                                                                                                                                                                                                                                  |
| The treatment of central sensitization in an adolescent using pain neuroscience education and graded exposure to activity: A case report. <sup>74</sup> | Pack et al.                        | 2018      | United States | Explain Pain                                              | Case report                 | Chronic pain (unspecified) | <a href="https://doi.org/10.1080/09593985.2018.1551454">Pack, R., Gilliland, R., &amp; Mecham, A. (2020). The treatment of central sensitization in an adolescent using pain neuroscience education and graded exposure to activity: A case report. Physiotherapy Theory &amp; Practice, 36(10), 1164-1174. https://doi.org/10.1080/09593985.2018.1551454</a>                                                                   |
| Pain Revolution: Pain Facts <sup>75</sup>                                                                                                               | Pain Revolution                    | ongoing   | Australia     | Pain Revolution: Pain Facts                               | Website                     | Chronic pain (unspecified) | <a href="https://www.painrevolution.org/painfacts">Pain Revolution. (2025). Pain Revolution: Pain Facts. https://www.painrevolution.org/painfacts</a>                                                                                                                                                                                                                                                                           |
| A digital health psychological intervention (WebMAP Mobile) for children and adolescents with chronic pain: results of a hybrid effectiveness-          | Palermo et al.                     | 2020      | United States | Web-based Management for Adolescent Pain (Web-MAP mobile) | Randomised controlled trial | Chronic pain (unspecified) | <a href="https://doi.org/10.1080/09593985.2020.1811111">Palermo, T. M., de la Vega, R., Murray, C., Law, E., Chuan, Z., &amp; Zhou, C. (2020). A digital health psychological intervention (WebMAP Mobile) for children and adolescents with chronic pain: results of a hybrid effectiveness-implementation stepped-wedge cluster randomized trial. PAIN, 161(12), 2763-2774. https://doi.org/10.1080/09593985.2020.1811111</a> |

Supplementary Material 2: Reference List of Included Records

|                                                                                                                                                                                      |                |      |                                 |                                                           |                             |                            |                                                                                                                                                                                                                                                                                                                                                                                                                                                                                                             |
|--------------------------------------------------------------------------------------------------------------------------------------------------------------------------------------|----------------|------|---------------------------------|-----------------------------------------------------------|-----------------------------|----------------------------|-------------------------------------------------------------------------------------------------------------------------------------------------------------------------------------------------------------------------------------------------------------------------------------------------------------------------------------------------------------------------------------------------------------------------------------------------------------------------------------------------------------|
| implementation stepped-wedge cluster randomized trial. <sup>76</sup>                                                                                                                 |                |      |                                 |                                                           |                             |                            | <a href="https://doi.org/10.1097/j.pain.0000000000001994">https://doi.org/10.1097/j.pain.0000000000001994</a>                                                                                                                                                                                                                                                                                                                                                                                               |
| iCanCope with Sickle Cell Pain: Design of a randomized controlled trial of a smartphone and web-based pain self-management program for youth with sickle cell disease. <sup>79</sup> | Palermo et al. | 2018 | Other: United States and Canada | iCanCope with Pain™                                       | Randomised controlled trial | Chronic pain (unspecified) | Palermo, T. M., Law, E. F., Fales, J., Bromberg, M. H., Jessen-Fiddick, T., & Tai, G. (2016). Internet-delivered cognitive-behavioral treatment for adolescents with chronic pain and their parents: a randomized controlled multicenter trial. <i>PAIN</i> , 157(1). <a href="https://journals.lww.com/pain/fulltext/2016/01000/internet_delivered_cognitive_behavioral_treatment.18.aspx">https://journals.lww.com/pain/fulltext/2016/01000/internet_delivered_cognitive_behavioral_treatment.18.aspx</a> |
| Internet-delivered cognitive-behavioral treatment for adolescents with chronic pain and their parents: a randomized controlled multicenter trial <sup>77</sup>                       | Palermo et al. | 2016 | Australia                       | Web-based Management for Adolescent Pain (Web-MAP mobile) | Randomised controlled trial | Chronic pain (unspecified) | Palermo, T. M., Law, E. F., Zhou, C., Holley, A. L., Logan, D., & Tai, G. (2015). Trajectories of change during a randomized controlled trial of internet-delivered psychological treatment for adolescent chronic pain: how does change in pain and function relate? <i>PAIN</i> , 156(4), 626-634. <a href="https://doi.org/10.1097/01.j.pain.0000460355.17246.6c">https://doi.org/10.1097/01.j.pain.0000460355.17246.6c</a>                                                                              |
| Trajectories of change during a randomized controlled trial of internet-delivered psychological treatment for                                                                        | Palermo et al. | 2015 | United States                   | Web-based Management for Adolescent Pain (Web-MAP mobile) | Randomised controlled trial | Chronic pain (unspecified) | Palermo, T. M., Zempsky, W. T., Dampier, C. D., Lalloo, C., Hundert, A. S., Murphy, L. K., Bakshi, N., & Stinson, J. N. (2018). iCanCope with Sickle Cell Pain: Design of a randomized controlled trial of a smartphone and web-based pain self-management program for youth with sickle                                                                                                                                                                                                                    |

Supplementary Material 2: Reference List of Included Records

|                                                                                                                                                |             |      |                |                                                  |                             |                            |                                                                                                                                                                                                                                                                                                                                                                                         |
|------------------------------------------------------------------------------------------------------------------------------------------------|-------------|------|----------------|--------------------------------------------------|-----------------------------|----------------------------|-----------------------------------------------------------------------------------------------------------------------------------------------------------------------------------------------------------------------------------------------------------------------------------------------------------------------------------------------------------------------------------------|
| adolescent chronic pain: how does change in pain and function relate? <sup>78</sup>                                                            |             |      |                |                                                  |                             |                            | <a href="https://doi.org/https://dx.doi.org/10.1016/j.cct.2018.10.006">cell disease. Contemp Clin Trials, 74(101242342), 88-96. https://doi.org/https://dx.doi.org/10.1016/j.cct.2018.10.006</a>                                                                                                                                                                                        |
| Development and feasibility testing of a Pain Neuroscience Education program for children with chronic pain: treatment protocol. <sup>80</sup> | Pas et al.  | 2018 | Other: Belgium | PNE4Kids                                         | Other: Protocol             | Chronic pain (unspecified) | <a href="https://doi.org/10.1016/j.bjpt.2018.02.004">Pas, R., Meeus, M., Malfliet, A., Baert, I., Oosterwijck, S. V., Leysen, L., Nijs, J., &amp; Ickmans, K. (2018). Development and feasibility testing of a Pain Neuroscience Education program for children with chronic pain: treatment protocol. Braz J Phys Ther, 22(3), 248-253. https://doi.org/10.1016/j.bjpt.2018.02.004</a> |
| Pain Neuroscience Education for Children with Functional Abdominal Pain Disorders: A Randomized Comparative Pilot Study <sup>81</sup>          | Pas et al.  | 2020 | Other: Belgium | PNE4Kids                                         | Randomised controlled trial | Chronic pain (Abdominal)   | <a href="https://doi.org/10.1016/j.bjpt.2018.02.004">Pas, R., Rheel, E., Van Oosterwijck, S., Foubert, A., De Pauw, R., Leysen, L., Roete, A., Nijs, J., Meeus, M., &amp; Ickmans, K. (2020). Pain Neuroscience Education for Children with Functional Abdominal Pain Disorders: A Randomized Comparative Pilot Study. 9(6).</a>                                                        |
| Zoe and Zak's Pain Hacks <sup>82</sup>                                                                                                         | Pate        | 2022 | Australia      | Zoe and Zak's Pain Hacks                         | Other: Book                 | Chronic pain (unspecified) | <a href="https://www.zoemandzakspainhacks.com/">Pate, J. (2022). Zoe and Zak's Pain Hacks. https://www.zoemandzakspainhacks.com/</a>                                                                                                                                                                                                                                                    |
| Creating online animated videos to reach and engage youth: Lessons learned from pain science education and a call to action <sup>83</sup>      | Pate et al. | 2020 | Australia      | Mysterious Science of Pain' and 'Tame the Beast' | Text and opinion            | Chronic pain (unspecified) | <a href="https://doi.org/10.1002/pne2.12015">Pate, J. W., Heathcote, L. C., Simons, L. E., Leake, H., &amp; Moseley, G. L. (2020). Creating online animated videos to reach and engage youth: Lessons learned from pain science education and a call to action. Paediatr Neonatal Pain, 2(4), 131-138. https://doi.org/10.1002/pne2.12015</a>                                           |

Supplementary Material 2: Reference List of Included Records

|                                                                                                                                                                                |                            |             |                      |                                                                         |                                                    |                                   |                                                                                                                                                                                                                                                                                                                                                                                                                                                                                                                                                             |
|--------------------------------------------------------------------------------------------------------------------------------------------------------------------------------|----------------------------|-------------|----------------------|-------------------------------------------------------------------------|----------------------------------------------------|-----------------------------------|-------------------------------------------------------------------------------------------------------------------------------------------------------------------------------------------------------------------------------------------------------------------------------------------------------------------------------------------------------------------------------------------------------------------------------------------------------------------------------------------------------------------------------------------------------------|
| <p>A journey to learn about pain: the development and validation of a comic book about pain neuroscience education for children<sup>84</sup></p>                               | <p>Reis et al.</p>         | <p>2022</p> | <p>Other: Brazil</p> | <p>A journey to learn about pain: comic book</p>                        | <p>Book</p>                                        | <p>Chronic pain (unspecified)</p> | <p>Reis, F., Palermo, T. M., Acalantis, L., Nogueira, L. C., Meziat-Filho, N., Louw, A., &amp; Ickmans, K. (2022). "A journey to learn about pain": the development and validation of a comic book about pain neuroscience education for children. <i>Braz J Phys Ther</i>, 26(1), 100348. <a href="https://doi.org/https://doi.org/10.1016/j.bjpt.2021.04.009">https://doi.org/https://doi.org/10.1016/j.bjpt.2021.04.009</a></p>                                                                                                                          |
| <p>RetrainPain English resources<sup>85</sup></p>                                                                                                                              | <p>RetrainPain</p>         | <p>2025</p> | <p>United States</p> | <p>RetrainPain</p>                                                      | <p>Website</p>                                     | <p>Chronic pain (unspecified)</p> | <p>RetrainPain. (2025). RetrainPain English resources. <a href="https://www.retrainpain.org/languages/english">https://www.retrainpain.org/languages/english</a></p>                                                                                                                                                                                                                                                                                                                                                                                        |
| <p>Changes in Coping, Pain, and Activity After Cognitive-Behavioral Training: A Randomized Clinical Trial for Pediatric Sickle Cell Disease Using Smartphones<sup>86</sup></p> | <p>Schatz et al.</p>       | <p>2015</p> | <p>United States</p> | <p>No title - resource is described in the paper</p>                    | <p>Randomised controlled trial</p>                 | <p>Sickle cell disease</p>        | <p>Schatz, J., Schlenz, A. M., McClellan, C. B., Puffer, E. S., Hardy, S., Pfeiffer, M., &amp; Roberts, C. W. (2015). <i>Changes in Coping, Pain, and Activity After Cognitive-Behavioral Training: A Randomized Clinical Trial for Pediatric Sickle Cell Disease Using Smartphones</i>. <i>Clin J Pain</i>, 31(6). <a href="https://journals.lww.com/clinicalpain/fulltext/2015/06000/changes_in_coping_pain_and_activity_after.7.aspx">https://journals.lww.com/clinicalpain/fulltext/2015/06000/changes_in_coping_pain_and_activity_after.7.aspx</a></p> |
| <p>Management of chronic pain in children and young people: summary.<sup>87</sup></p>                                                                                          | <p>Scottish Government</p> | <p>2018</p> | <p>UK</p>            | <p>Management of chronic pain in children and young people: summary</p> | <p>Other: Summary guideline (available online)</p> | <p>Chronic pain (unspecified)</p> | <p>Scottish Government. (2018). <i>Management of chronic pain in children and young people: summary</i>. <a href="https://www.gov.scot/publications/management-chronic-pain-children-young-people/">https://www.gov.scot/publications/management-chronic-pain-children-young-people/</a></p>                                                                                                                                                                                                                                                                |

Supplementary Material 2: Reference List of Included Records

|                                                                                                                                                                                                                                     |                |      |               |                                               |                             |                                |                                                                                                                                                                                                                                                                                                                                                                                                                                       |
|-------------------------------------------------------------------------------------------------------------------------------------------------------------------------------------------------------------------------------------|----------------|------|---------------|-----------------------------------------------|-----------------------------|--------------------------------|---------------------------------------------------------------------------------------------------------------------------------------------------------------------------------------------------------------------------------------------------------------------------------------------------------------------------------------------------------------------------------------------------------------------------------------|
| An investigation of the effect of smartphone-based pain management application on pain intensity and the quality-of-life dimensions in adolescents with chronic pain: a cluster randomized parallel-controlled trial. <sup>89</sup> | Shaygan et al. | 2021 | Other: Iran   | No title - resource is described in the paper | Randomised controlled trial | Chronic pain (unspecified)     | Shaygan, M., & Jaberi, A. (2021). The effect of a smartphone-based pain management application on pain intensity and quality of life in adolescents with chronic pain. <i>Sci Rep</i> , 11(1), 6588. <a href="https://doi.org/https://dx.doi.org/10.1038/s41598-021-86156-8">https://doi.org/https://dx.doi.org/10.1038/s41598-021-86156-8</a>                                                                                        |
| The effect of a smartphone-based pain management application on pain intensity and quality of life in adolescents with chronic pain. <sup>88</sup>                                                                                  | Shaygan et al. | 2021 | Other: Iran   | No title - resource is described in the paper | Other: Mixed methods        | Chronic pain (unspecified)     | Shaygan, M., Jahandide, Z., & zarifsanaiey, N. (2021). An investigation of the effect of smartphone-based pain management application on pain intensity and the quality-of-life dimensions in adolescents with chronic pain: a cluster randomized parallel-controlled trial. <i>Quality of Life Research</i> , 30(12), 3431-3442. <a href="https://doi.org/10.1007/s11136-021-02891-5">https://doi.org/10.1007/s11136-021-02891-5</a> |
| Rapid Transition to Virtual Assessment and Treatment in an Interdisciplinary Randomized Clinical Trial for Youth With Chronic Pain: Adaptations and                                                                                 | Shear et al.   | 2023 | United States | GET Living                                    | Randomised controlled trial | Chronic pain (musculoskeletal) | Shear, D., Harrison, L. E., O'Brien, S., Khazendar, Z., Lyons, S., Morgan, J. J., Chan, S. K., Feinstein, A. B., & Simons, L. E. (2022). Rapid Transition to Virtual Assessment and Treatment in an Interdisciplinary Randomized Clinical Trial for Youth With Chronic Pain: Adaptations and Implications for Future Trials. <i>Clinical</i>                                                                                          |

Supplementary Material 2: Reference List of Included Records

|                                                                                                                                                                                |                 |      |               |                                               |                                        |                            |                                                                                                                                                                                                                                                                                                                                                                                                                                            |
|--------------------------------------------------------------------------------------------------------------------------------------------------------------------------------|-----------------|------|---------------|-----------------------------------------------|----------------------------------------|----------------------------|--------------------------------------------------------------------------------------------------------------------------------------------------------------------------------------------------------------------------------------------------------------------------------------------------------------------------------------------------------------------------------------------------------------------------------------------|
| Implications for Future Trials. <sup>90</sup>                                                                                                                                  |                 |      |               |                                               |                                        |                            | <a href="https://doi.org/10.1097/AJP.0000000000001040">Journal of Pain, 38(7), 459-469. https://doi.org/10.1097/AJP.0000000000001040</a>                                                                                                                                                                                                                                                                                                   |
| Preliminary evaluation of the clinical implementation of cognitive-behavioral therapy for chronic pain management in pediatric sickle cell disease. <sup>91</sup>              | Sil et al.      | 2020 | United States | No title - resource is described in the paper | Other: comparative effectiveness study | Chronic pain (unspecified) | <a href="https://doi.org/10.1016/j.ctim.2020.102348">Sil, S., Lai, K., Lee, J. L., Gilleland Marchak, J., Thompson, B., Cohen, L., Lane, P., &amp; Dampier, C. (2020). Preliminary evaluation of the clinical implementation of cognitive-behavioral therapy for chronic pain management in pediatric sickle cell disease. Complement Ther Med, 49, N.PAG-N.PAG. https://doi.org/10.1016/j.ctim.2020.102348</a>                            |
| The comfort ability program for adolescents with sickle cell pain: Evaluating feasibility and acceptability of an inpatient group-based clinical implementation. <sup>92</sup> | Sil et al.      | 2021 | United States | The ComfortAbility Program                    | Non-randomised experimental study      | Sickle cell disease        | <a href="https://doi.org/10.1002/pbc.29013">Sil, S., Lee, J. L., Klosky, J., Vaz, A., Mee, L., Cochran, S., Thompson, B., &amp; Coakley, R. (2021). The comfort ability program for adolescents with sickle cell pain: Evaluating feasibility and acceptability of an inpatient group-based clinical implementation. Pediatr Blood Cancer, 68(6), 1-10. https://doi.org/10.1002/pbc.29013</a>                                              |
| The Effect of a Brief Physician-Delivered Neurobiologically Oriented, Cognitive Behavioural Therapy (Brief-CBT) Intervention on Chronic Pain Acceptance in Youth               | Simmonds et al. | 2022 | Canada        | Pain 101                                      | Randomised controlled trial            | Chronic pain (unspecified) | <a href="https://doi.org/10.1016/j.jcct.2022.100000">Simmonds, M. K., Dick, B. D., Verrier, M. J., Reid, K. L., Jamieson-Lega, K., Balisky, K. J., Davey, A. E., &amp; Freeman, K. M. (2022). The Effect of a Brief Physician-Delivered Neurobiologically Oriented, Cognitive Behavioural Therapy (Brief-CBT) Intervention on Chronic Pain Acceptance in Youth with Chronic Pain—A Randomized Controlled Trial. Children, 9(9), N.PAG-</a> |

Supplementary Material 2: Reference List of Included Records

|                                                                                                                                                   |                   |      |               |                                        |  |                             |                                |                                                                                                                                                                                                                                                                                                                                                                                                                                                                                                   |
|---------------------------------------------------------------------------------------------------------------------------------------------------|-------------------|------|---------------|----------------------------------------|--|-----------------------------|--------------------------------|---------------------------------------------------------------------------------------------------------------------------------------------------------------------------------------------------------------------------------------------------------------------------------------------------------------------------------------------------------------------------------------------------------------------------------------------------------------------------------------------------|
| with Chronic Pain: A Randomized Controlled Trial. <sup>93</sup>                                                                                   |                   |      |               |                                        |  |                             |                                | N.PAG.<br><a href="https://doi.org/10.3390/children9091293">https://doi.org/10.3390/children9091293</a>                                                                                                                                                                                                                                                                                                                                                                                           |
| A randomized controlled trial of graded exposure treatment (GET living) for adolescents with chronic pain. <sup>94</sup>                          | Simons et al.     | 2024 | United States | GET living                             |  | Randomised controlled trial | Chronic pain (musculoskeletal) | Simons, L. E., Harrison, L. E., Boothroyd, D. B., Parvathinathan, G., Van Orden, A. R., O'Brien, S. F., Schofield, D., Kraindler, J., Shrestha, R., Vlaeyen, J. W. S., & Wicksell, R. K. (2024). A randomized controlled trial of graded exposure treatment (GET living) for adolescents with chronic pain. <i>PAIN</i> , 165(1), 177-191.<br><a href="https://doi.org/https://dx.doi.org/10.1097/j.pain.0000000000003010">https://doi.org/https://dx.doi.org/10.1097/j.pain.0000000000003010</a> |
| Evaluation of Digital Technologies Tailored to Support Young People's Self-Management of Musculoskeletal Pain: Mixed Methods Study. <sup>95</sup> | Slater et al.     | 2020 | Australia     | iCanCope with Pain™; Young Pain Health |  | Other: Mixed methods        | Chronic pain (musculoskeletal) | Slater, H., Stinson, J. N., Jordan, J. E., Chua, J., Low, B., Laloo, C., Pham, Q., Cafazzo, J. A., & Briggs, A. M. (2020). Evaluation of Digital Technologies Tailored to Support Young People's Self-Management of Musculoskeletal Pain: Mixed Methods Study. <i>J Med Internet Res</i> , 22(6), e18315.<br><a href="https://doi.org/10.2196/18315">https://doi.org/10.2196/18315</a>                                                                                                            |
| ImaginAction <sup>96</sup>                                                                                                                        | Stanford Medicine | 2019 | United States | ImaginAction                           |  | Website                     | Chronic pain (unspecified)     | Stanford Medicine. (2019). ImaginAction.<br><a href="https://imaginaction.stanford.edu/manage-my-chronic-pain/">https://imaginaction.stanford.edu/manage-my-chronic-pain/</a>                                                                                                                                                                                                                                                                                                                     |
| iCanCope with Pain: User-centred design of a web- and mobile-based self-management                                                                | Stinson et al.    | 2014 | Canada        | iCanCope with Pain™                    |  | Qualitative research        | Chronic pain (unspecified)     | Stinson, J. N., Laloo, C., Harris, L., Isaac, L., Campbell, F., Brown, S., Ruskin, D., Gordon, A., Galonski, M., Pink, L. R., Buckley, N., Henry, J. L., White, M., & Karim, A. (2014). iCanCope with                                                                                                                                                                                                                                                                                             |

Supplementary Material 2: Reference List of Included Records

|                                                                                           |                                |      |                |                                                                                         |                             |                                  |                                                                                                                                                                                                                                                                                                                                                                                                                                                                                                                                                                     |
|-------------------------------------------------------------------------------------------|--------------------------------|------|----------------|-----------------------------------------------------------------------------------------|-----------------------------|----------------------------------|---------------------------------------------------------------------------------------------------------------------------------------------------------------------------------------------------------------------------------------------------------------------------------------------------------------------------------------------------------------------------------------------------------------------------------------------------------------------------------------------------------------------------------------------------------------------|
| program for youth with chronic pain based on identified health care needs. <sup>97</sup>  |                                |      |                |                                                                                         |                             |                                  | <a href="https://doi.org/10.1155/2014/935278">Pain™: User-centred design of a web- and mobile-based self-management program for youth with chronic pain based on identified health care needs. Pain Res Manag, 19(5), 257-265. https://doi.org/10.1155/2014/935278</a>                                                                                                                                                                                                                                                                                              |
| Chronic pain: How to treat and manage in older children. <sup>99</sup>                    | The Hospital for Sick Children | 2019 | Canada         | Chronic pain: How to treat and manage in older children: The Hospital for Sick Children | Website                     | Chronic pain (unspecified)       | <a href="https://www.youtube.com/watch?v=EL1E54nH_7c">The Hospital for Sick Children. (2021). What is chronic pain? https://www.youtube.com/watch?v=EL1E54nH_7c</a>                                                                                                                                                                                                                                                                                                                                                                                                 |
| Power Over Pain Youth Portal <sup>100</sup>                                               | The Hospital for Sick Children | 2025 | Canada         | Power Over Pain Youth Portal                                                            | Website                     | Chronic pain (unspecified)       | <a href="https://www.aboutkidshealth.ca/healthaz/pain/anaesthesia/chronic-pain-how-to-treat-and-manage-in-older-children/?hub=chronicpain&amp;hubSite=https://www.aboutkidshealth.ca/&amp;collectionHub=pain&amp;topic=chronicpain">The Hospital for Sick Children. (2025a). Chronic pain: How to treat and manage in older children. https://www.aboutkidshealth.ca/healthaz/pain/anaesthesia/chronic-pain-how-to-treat-and-manage-in-older-children/?hub=chronicpain&amp;hubSite=https://www.aboutkidshealth.ca/&amp;collectionHub=pain&amp;topic=chronicpain</a> |
| What is chronic pain? <sup>98</sup>                                                       | The Hospital for Sick Children | 2021 | Canada         | Chronic pain: How to treat and manage in older children: The Hospital for Sick Children | Other: Youtube video        | Chronic pain (unspecified)       | <a href="https://www.popyouth.ca/">The Hospital for Sick Children. (2025b). Power Over Pain Youth Portal. https://www.popyouth.ca/</a>                                                                                                                                                                                                                                                                                                                                                                                                                              |
| A randomized controlled trial of Internet-based self-help training for recurrent headache | Trautmann & Kröner-Herwig      | 2009 | Other: Germany | No title - resource is described in the paper                                           | Randomised controlled trial | Chronic pain (Headache/migraine) | <a href="https://doi.org/10.1007/s00127-010-0100-0">Trautmann, E., &amp; Kröner-Herwig, B. (2010). A randomized controlled trial of Internet-based self-help training for recurrent headache in childhood and adolescence. Behaviour Research and Therapy, 48(1), 28-37.</a>                                                                                                                                                                                                                                                                                        |

Supplementary Material 2: Reference List of Included Records

|                                                                                                                                  |                                                              |      |                        |                                                                   |                                   |                                                                  |                                                                                                                                                                                                                                                                                                                                                                                                                                            |
|----------------------------------------------------------------------------------------------------------------------------------|--------------------------------------------------------------|------|------------------------|-------------------------------------------------------------------|-----------------------------------|------------------------------------------------------------------|--------------------------------------------------------------------------------------------------------------------------------------------------------------------------------------------------------------------------------------------------------------------------------------------------------------------------------------------------------------------------------------------------------------------------------------------|
| in childhood and adolescence <sup>101</sup>                                                                                      |                                                              |      |                        |                                                                   |                                   |                                                                  | <a href="https://doi.org/https://doi.org/10.1016/j.brat.2009.09.004">https://doi.org/https://doi.org/10.1016/j.brat.2009.09.004</a>                                                                                                                                                                                                                                                                                                        |
| Living Well with Chronic Pain <sup>102</sup>                                                                                     | U.S. Pain Foundation                                         | 2023 | United States          | Living Well with Chronic Pain                                     | Website                           | Chronic pain (musculoskeletal); Chronic pain (headache/migraine) | U. S. Pain Foundation. (2023). <a href="https://uspainfoundation.org/resources/LivingWellwithChronicPain">Living Well with Chronic Pain</a> . <a href="https://uspainfoundation.org/resources/">https://uspainfoundation.org/resources/</a>                                                                                                                                                                                                |
| Advice on chronic pain for young people <sup>103</sup>                                                                           | University of Oxford; Department of Psychiatry of Psychiatry | 2023 | UK                     | Advice on chronic pain for young people: University of Oxford     | Website                           | Chronic pain (unspecified)                                       | University of Oxford. (2023). <a href="https://www.psych.ox.ac.uk/news/advice-on-chronic-pain-for-young-people">Advice on chronic pain for young people</a> . <a href="https://www.psych.ox.ac.uk/news/advice-on-chronic-pain-for-young-people">https://www.psych.ox.ac.uk/news/advice-on-chronic-pain-for-young-people</a>                                                                                                                |
| Effects of a Guided Internet-Delivered Self-Help Intervention for Adolescents With Chronic Pain. <sup>104</sup>                  | Voermann et al.                                              | 2015 | Other: The Netherlands | Move it Now                                                       | Randomised controlled trial       | Chronic pain (headache/migraine, Chronic pain (musculoskeletal)  | Voerman, J. S., Remerie, S., Westendorp, T., Timman, R., Busschbach, J. J. V., Passchier, J., & de Klerk, C. (2015). <a href="https://doi.org/10.1016/j.jpain.2015.07.011">Effects of a Guided Internet-Delivered Self-Help Intervention for Adolescents With Chronic Pain</a> . <i>Journal of Pain</i> , <i>16</i> (11), 1115-1126. <a href="https://doi.org/10.1016/j.jpain.2015.07.011">https://doi.org/10.1016/j.jpain.2015.07.011</a> |
| The impact of a short educational movie on promoting chronic pain health literacy in school: A feasibility study. <sup>105</sup> | Wager et al.                                                 | 2018 | Other: Germany         | Understanding pain – and what’s to be done about it in 10 minutes | Non-randomised experimental study | Chronic pain (unspecified)                                       | Wager, J., Stahlschmidt, L., Heuer, F., Troche, S., & Zernikow, B. (2018). <a href="https://doi.org/10.1002/ejp.1202">The impact of a short educational movie on promoting chronic pain health literacy in school: A feasibility study</a> . <i>European Journal of Pain</i> , <i>22</i> (6), 1142-1150. <a href="https://doi.org/10.1002/ejp.1202">https://doi.org/10.1002/ejp.1202</a>                                                   |
| Adolescents' experiences of Help Overcoming Pain Early school based                                                              | Wallbing et al.                                              | 2023 | Other: Sweden          | Help Overcoming Pain Early (HOPE)                                 | Qualitative research              | Chronic pain (unspecified)                                       | Wallbing, U., Nilsson, S., Wigert, H., & Lundberg, M. (2023). <a href="https://doi.org/10.1016/j.jpain.2023.07.001">Adolescents' experiences of Help Overcoming Pain Early—A school based</a>                                                                                                                                                                                                                                              |

Supplementary Material 2: Reference List of Included Records

|                                                                                                                                              |                                 |      |               |                                                                                                                    |                       |                                |                                                                                                                                                                                                                                                                                                                                                                              |
|----------------------------------------------------------------------------------------------------------------------------------------------|---------------------------------|------|---------------|--------------------------------------------------------------------------------------------------------------------|-----------------------|--------------------------------|------------------------------------------------------------------------------------------------------------------------------------------------------------------------------------------------------------------------------------------------------------------------------------------------------------------------------------------------------------------------------|
| person-centred intervention for adolescents with chronic pain. <sup>106</sup>                                                                |                                 |      |               |                                                                                                                    |                       |                                | <a href="https://doi.org/10.1002/pne2.12113">person-centred intervention for adolescents with chronic pain. Paediatric &amp; Neonatal Pain, 5(4), 119-126. https://doi.org/10.1002/pne2.12113</a>                                                                                                                                                                            |
| Managing Chronic Pain in Schools <sup>107</sup>                                                                                              | Women's and Children's Hospital | 2025 | Australia     | Managing Chronic Pain in Schools                                                                                   | Website               | Chronic pain (unspecified)     | <a href="https://www.wch.sa.gov.au/patients-visitors/children/care-and-support/paediatric-chronic-pain-service/managing-chronic-pain-in-schools">Women's and Children's Health Network. (2025). Managing Chronic Pain in Schools. https://www.wch.sa.gov.au/patients-visitors/children/care-and-support/paediatric-chronic-pain-service/managing-chronic-pain-in-schools</a> |
| Use of Therapeutic Neuroscience Education to address psychosocial factors associated with acute low back pain: a case report. <sup>108</sup> | Zimney et al.                   | 2013 | United States | No title - resource is described in the paper                                                                      | Case report           | Chronic pain (musculoskeletal) | <a href="https://doi.org/10.3109/09593985.2013.856508">Zimney, K., Louw, A., &amp; Puentedura, E. J. (2014). Use of Therapeutic Neuroscience Education to address psychosocial factors associated with acute low back pain: a case report. Physiotherapy Theory &amp; Practice, 30(3), 202-209. https://doi.org/10.3109/09593985.2013.856508</a>                             |
| The Chronic Pain & Illness Workbook for Teens: CBT and Mindfulness-Based Practices to Turn the Volume down on Pain <sup>109</sup>            | Zoffness                        | 2019 | United States | The Chronic Pain & Illness Workbook for Teens: CBT and Mindfulness-Based Practices to Turn the Volume down on Pain | Other: Teens workbook | Chronic pain (unspecified)     | <a href="#">Zoffness, R. (2019). <i>The Chronic Pain &amp; Illness Workbook for Teens: CBT and Mindfulness-Based Practices to Turn the Volume down on Pain</i>. Instant Help Books.</a>                                                                                                                                                                                      |
